# Supplementary material for: Evolutionary Analysis and Classification of OATs, OCTs, OCTNs, and Other SLC22 Transporters: Structure-Function Implications and Analysis of Sequence Motifs
Source: PubMed Central journal article supplement (PMC4633038; doi:10.1371/journal.pone.0140569), 2015-11-04

# hOCT1

\* = mapped from rOCT1

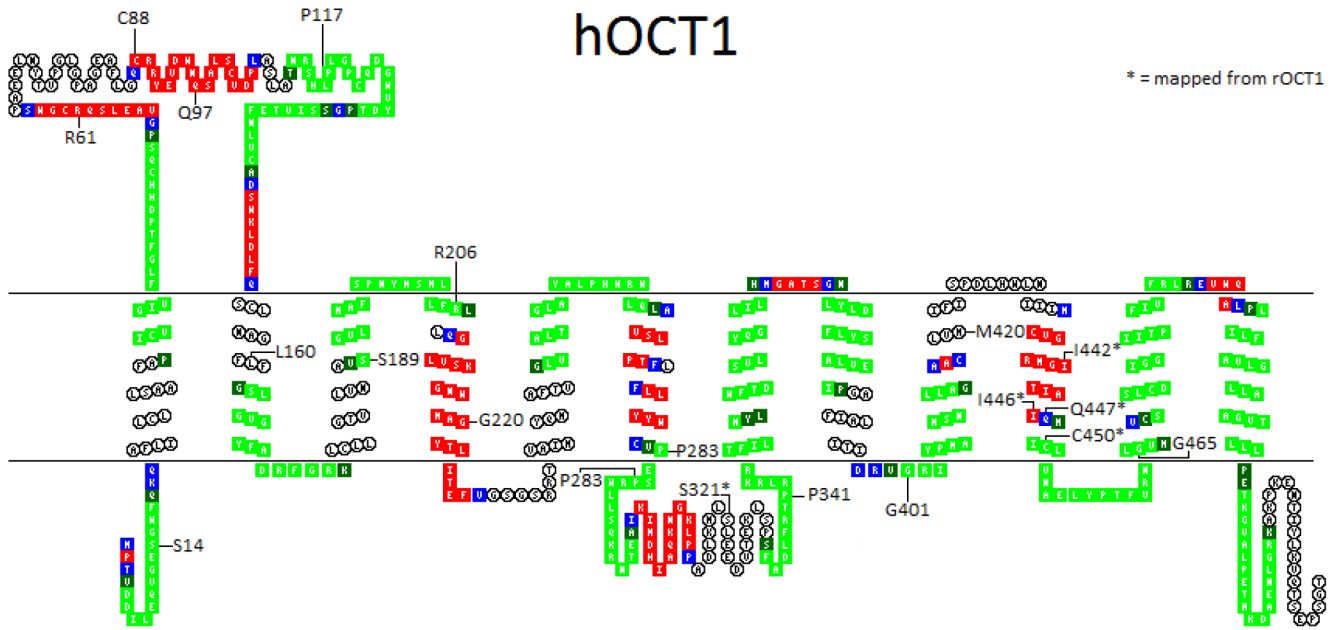

# hOCT2

\* = mapped from either rOCT2 and/or rbOCT2  
Note: N354 and R404 mapped from rbOCT2

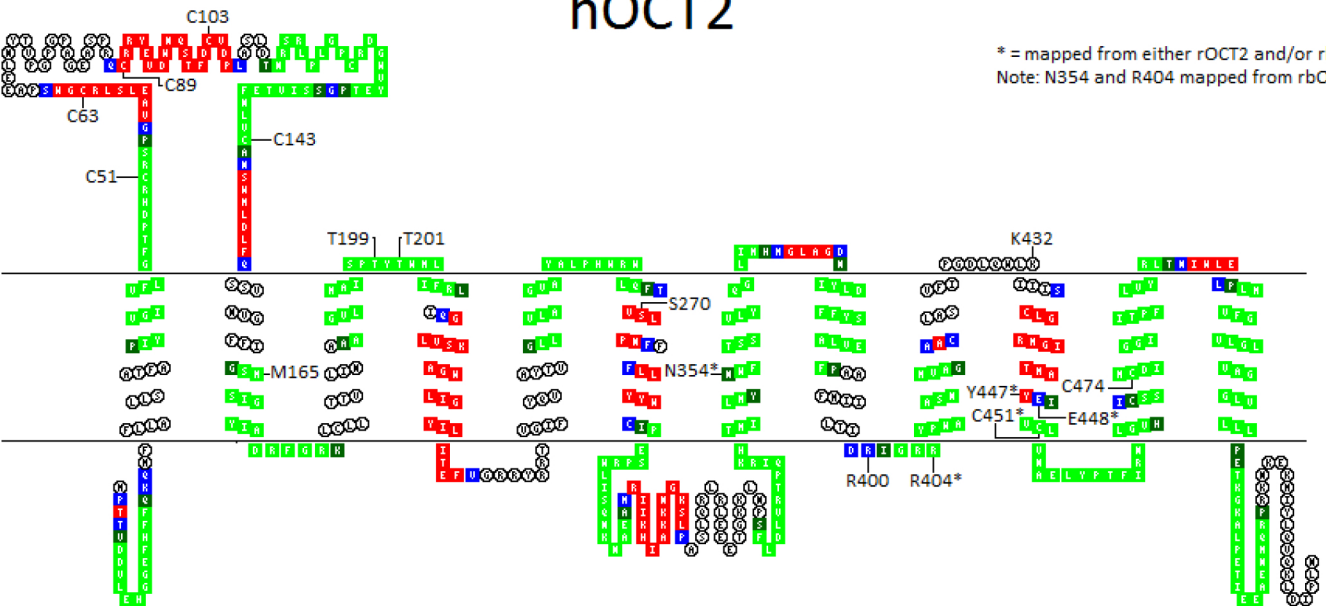

Supplement: pone.0140569.s005.pdf [file pone.0140569.s005.pdf]
